# Supplementary material for: Identification of the Genome Segments of Bluetongue Virus Type 26/Type 1 Reassortants Influencing Horizontal Transmission in a Mouse Model
Source: MDPI journal article supplement (doi:10.3390/v13112208), 2021-11-02
Supplement: s1 [file s1]

## Supplementary material

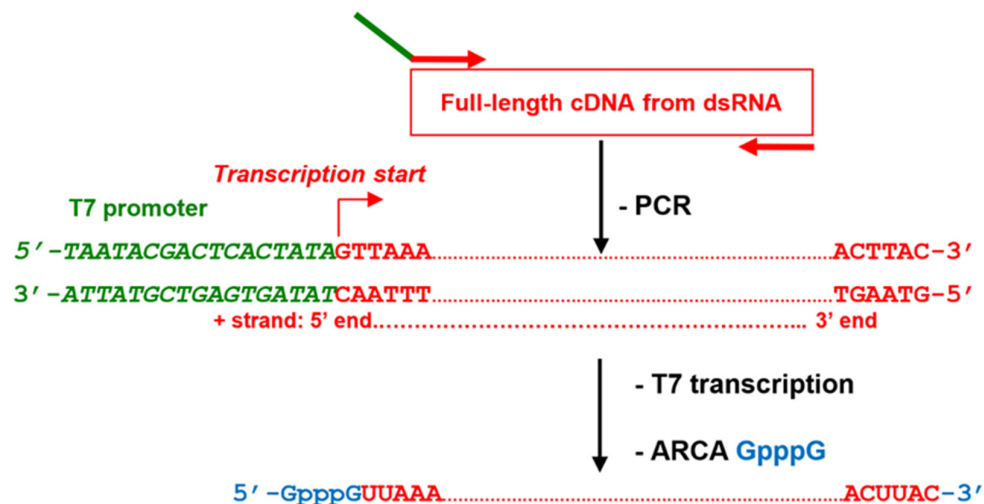

**Figure S1.** A schematic representation for generation of transcripts from linear PCR products representing the full-length cDNA copies of BTV genome segments (ARCA: anti-reverse cap analogue).

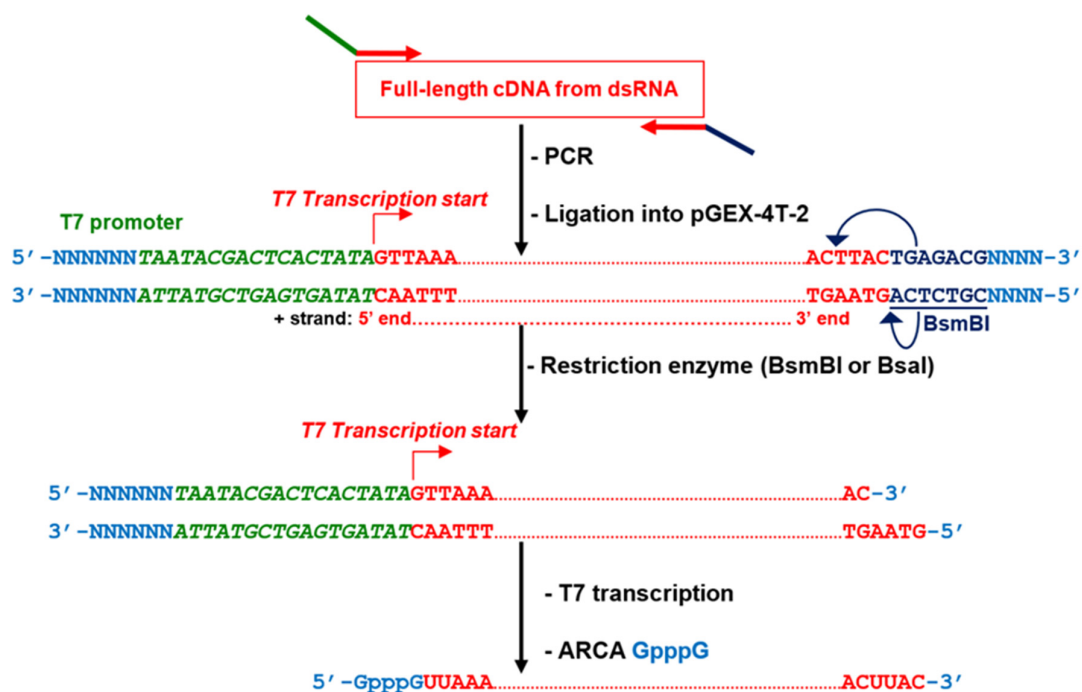

**Figure S2.** A schematic representation for generating transcripts from restriction enzyme linearised plasmids containing the full-length cDNA copies of BTV genome segments (ARCA: anti-reverse cap analogue).

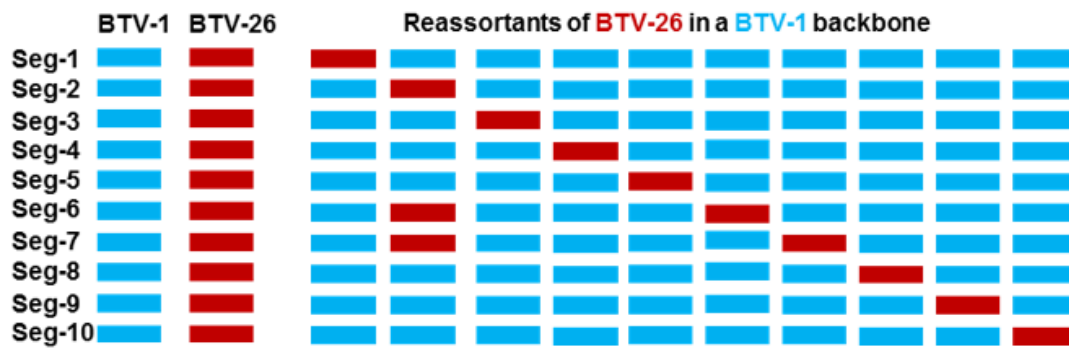

**Figure S3.** Schematic representation showing RNA combinations used to generate reassortants of BTV-26 in the BTV-1 backbone. The reassortants were designated RGBTV1:X<sub>(26)</sub> (e.g. RGBTV1:1<sub>(26)</sub>, RGBTV1:5<sub>(26)</sub>), where RGBTV1 refers to the genetic backbone of BTV1-RG<sub>C7</sub>, and X refers to the specific genome segment of BTV-26 introduced into the reassortant.

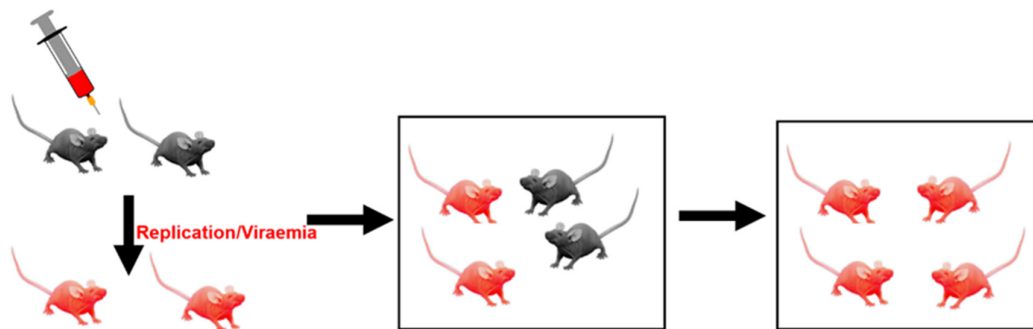

**Figure S4.** A schematic representation of the horizontal transmission experiment in IFNAR<sup>-/-</sup> mice. Red-coloured mice indicate where replication of a given BTV was detected by real-time RT-PCR.

**Table S1.** Primers designed for PCR amplification of full-length cDNAs of genome segments 1-10 of BTV-1. The minimal T7 promoter in the forward primer is shown in bold.

| Virus/segment | Primer sequence 5'→3'                              |
|---------------|----------------------------------------------------|
| BTV1-S1T7FOR  | <b>TAATACGACTCACTATAGT</b> TAAAAATGCAATGGTCGCAATC  |
| BTV1-S1REV    | GTAAGTGTAATGCGGCGCGTGC                             |
| BTV1-S2T7FOR  | <b>TAATACGACTCACTATAGT</b> TAAAAATAGTAGCGGATGGATG  |
| BTV1-S2REV    | GTAAGTCTAATAGTGCGCGGATC                            |
| BTV1-S3T7FOR  | <b>TAATACGACTCACTATAGT</b> TAAATTTCCGTAGCCATGGCTG  |
| BTV1-S3REV    | GTAAGTGTGTTCCCGCTGCCGC                             |
| BTV1-S4T7FOR  | <b>TAATACGACTCACTATAGT</b> TAAAAACATGCCTGAGCCACACG |
| BTV1-S4REV    | GTAAGTTGTACATGCCCCCTC                              |
| BTV1-S5T7FOR  | <b>TAATACGACTCACTATAGT</b> TAAAAAAGTTCTCTAGTTGGC   |
| BTV1-S5REV    | GTAAGTTGAAAAGTTCTAGTAGAGTG                         |
| BTV1-S6T7FOR  | <b>TAATACGACTCACTATAGT</b> TAAAAAGTGCGCCCTTAGCGAA  |
| BTV1-S6REV    | GTAAGTGTAAGTGCTTCCCGTCCG                           |
| BTV1-S7T7FOR  | <b>TAATACGACTCACTATAGT</b> TAAAAATCTATAGAGATGGACA  |
| BTV1-S7REV    | GTAAGTGTAATCTAAGAGACGTTTG                          |
| BTV1-S8T7FOR  | <b>TAATACGACTCACTATAGT</b> TAAAAAATCCTTGAGTCATGGAG |
| BTV1-S8REV    | GTAAGTGTAATAATCCCCCTAACC                           |
| BTV1-S9T7FOR  | <b>TAATACGACTCACTATAGT</b> TAAAAAATCGCATATGTCAGCTG |
| BTV1-S9REV    | GTAAGTGTAATAATCGCCCTACGTCA                         |
| BTV1-S10T7FOR | <b>TAATACGACTCACTATAGT</b> TAAAAAGTGTCGCTGCCATGCT  |
| BTV1-S10REV   | GTAAGTGTGTAGCGCCGCATACCCTC                         |
